# Supplementary material
Source: Springer Nature journal article supplement (https://www.springermedizin.de/resource/supplementary/12913_2008_1020_MOESM3_ESM.pdf/9536152)

## A6.Change in health status over the past 12 months

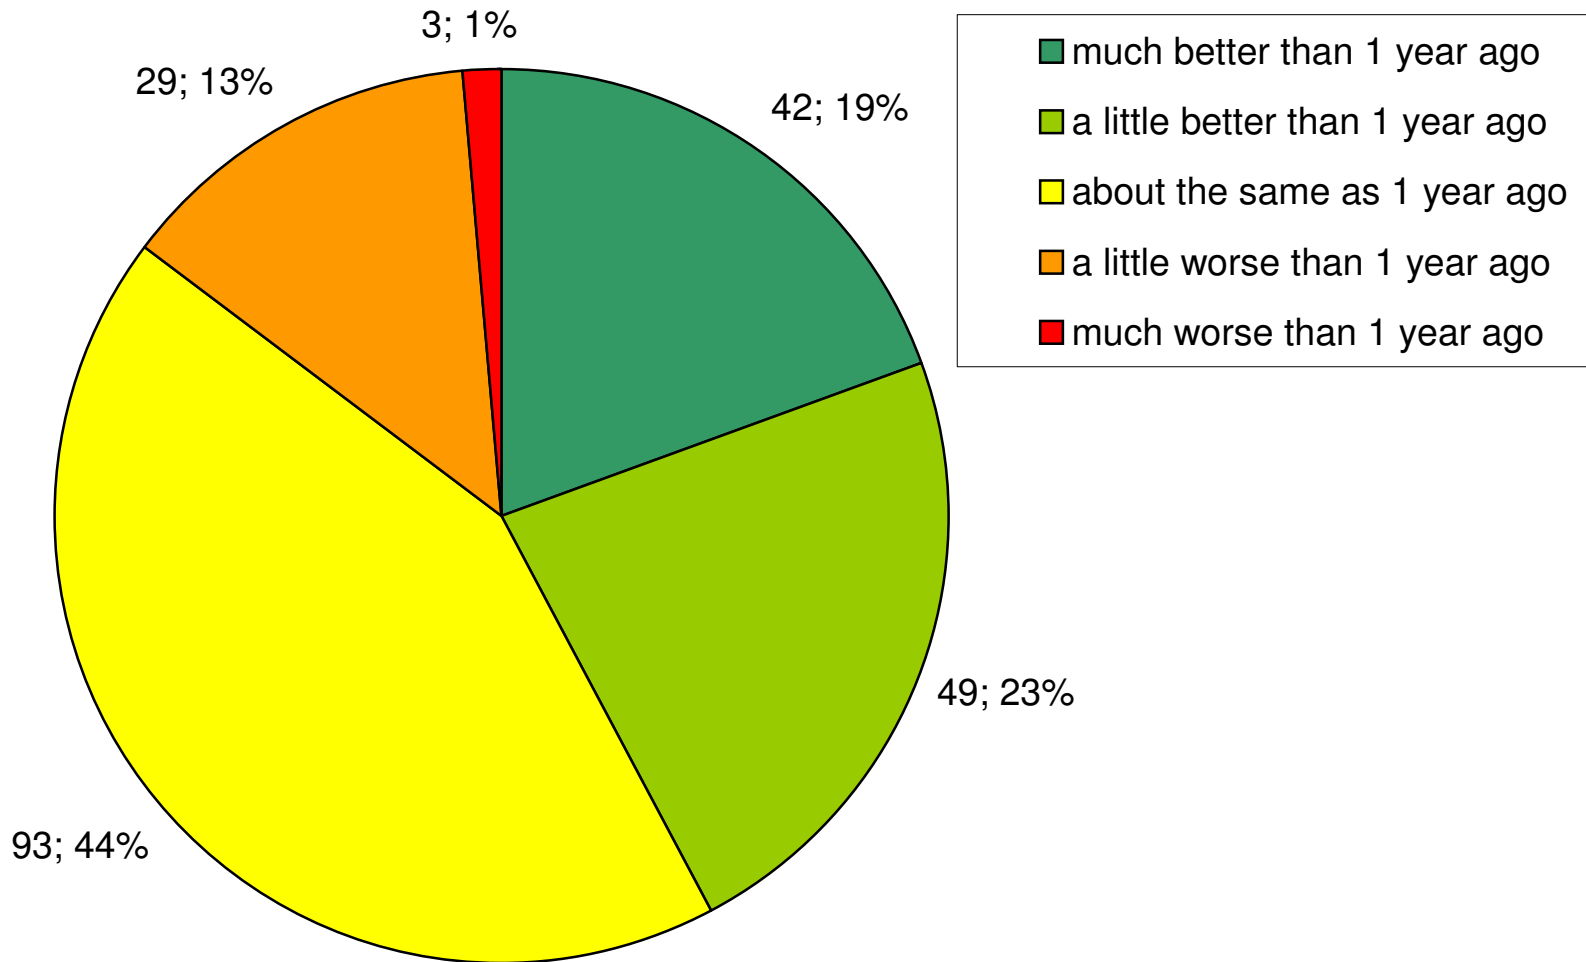

Supplement: MOESM3 [file 9536152]
